# Supplementary material
Source: Research Square preprint supplement (doi:10.21203/rs.3.rs-8929263/v1)
Supplement: Supplementary file 1 [file 2f898ae7a2e798734215fdb3.pdf]

### Supplementary Information

Measured energy exchange in coronal hole solar wind from its coronal origins to the heliosphere  
Rivera et al

**Supplementary Table 1:** Summary of remote observations utilized in the study. The table includes the diagnostics, associated mission or instrument, observation dates, altitude of observations, and methodology for deriving corresponding diagnoses.

| Diagnostic           | Observation Date (UT)            | Altitude                 | Methodology                                           |
|----------------------|----------------------------------|--------------------------|-------------------------------------------------------|
| Density              |                                  |                          |                                                       |
| SDO/AIA              | 2024-04-01 to 2024-04-15         | 1-1.25 R <sub>☉</sub>    | DEMT (Frazin et al. [70], Lloveras et al. [77])       |
| DKIST Cryo-NIRSP     | 2024-04-09 18:00                 | 1.05 R <sub>☉</sub>      | Fe XIII line ratio                                    |
| MLSO/UCoMP           | 2024-04-09 18:00                 | 1.05-1.95 R <sub>☉</sub> | Fe XIII line ratio                                    |
| MLSO/K-Cor           | 2024-04-09 18:00                 | 1.05-1.95 R <sub>☉</sub> | WL pB (van de Hulst [38])                             |
| Solar Orbiter/Metis  | 2024-03-29 05:15                 | 2-4 R <sub>☉</sub>       | WL pB (van de Hulst [38])                             |
| SOHO/LASCO-C2        | 2024-04-01 to 2024-04-15         | 2.5-6 R <sub>☉</sub>     | WL pB SRT (Frazin & Janzen [72], Vasquez et al. [74]) |
| Electron Temperature |                                  |                          |                                                       |
| SDO/AIA              | 2024-04-04 18:30-19:30           | On disk                  | DEM (Cheung et al. [44])                              |
| Solar Orbiter/SPICE  | 2024-04-04 06:20                 | On disk                  | DEM (Plowman et al. [50])                             |
| Velocity             |                                  |                          |                                                       |
| Hinode/EIS           | 2024-04-01 to 2024-04-03 (daily) | On disk                  | Doppler velocities                                    |
| Solar Orbiter/Metis  | 2024-03-29 05:15                 | 2-4 R <sub>☉</sub>       | Ly $\alpha$ Doppler dimming                           |
| SOHO/LASCO-C2        | 2024-04-01 to 2024-04-15         | 2.5-6 R <sub>☉</sub>     | Mass conservation and expansion factor*               |
| Magnetic Field       |                                  |                          |                                                       |
| MLSO/UCoMP           | 2024-04-09 18:00                 | 1.05-1.95 R <sub>☉</sub> | Coronal seismology (Yang et al. [22])                 |
| Non-thermal widths   |                                  |                          |                                                       |

|                  |                  |                     |                         |
|------------------|------------------|---------------------|-------------------------|
| DKIST Cryo-NIRSP | 2024-04-08 18:00 | 1.05 R <sub>☉</sub> | Spectral line fitting** |
|------------------|------------------|---------------------|-------------------------|

\*see details in Methods Section 4.7

\*\*see details in Methods Section 4.5

**Supplementary Table 2:** Summary of all the mean values used to compute the energy budget at the Sun, Parker Solar Probe, and Solar Orbiter. At the Sun, we take the mean values between 1.040-1.06 R<sub>sun</sub>. At Parker Solar Probe and Solar Orbiter, we use the average value across the carrington longitude 90-122

| Properties of the solar wind     | Sun (1.05 R <sub>☉</sub> )                      | Parker Solar Probe (11.75 R <sub>☉</sub> )         | Solar Orbiter (70 R <sub>☉</sub> )               |
|----------------------------------|-------------------------------------------------|----------------------------------------------------|--------------------------------------------------|
| $n_{p,e}$ (cm <sup>-3</sup> )    | $1.6 \pm 0.6 \times 10^8$                       | $3.6 \pm 0.48 \times 10^3$                         | $53.05 \pm 11.46$                                |
| $v_p$ (km s <sup>-1</sup> )      | $11.48 \pm 6.1$ (EIS), $9.98 \pm 10.60$ (SPICE) | $285.03 \pm 42.87$                                 | $456.04 \pm 78.79$                               |
| $T_p$ (MK)                       | $1.23 \pm 0.04$                                 | $0.826 \pm 0.201$                                  | $0.322 \pm 0.123$                                |
| $V_A$ (km s <sup>-1</sup> )      | $424.89 \pm 67.01$                              | $352.26 \pm 40.18$                                 | $103.45 \pm 20.8$                                |
| $B_R$ (gauss, nT)                | –                                               | $-901.12 \pm 94.25$ ,                              | $-16.86 \pm 7.44$                                |
| $ B $ (gauss, nT)                | $2.65 \pm 1.07$ , $2.65 \pm 1.07 \times 10^5$   | $9.64 \pm 0.5 \times 10^{-3}$ , $964.01 \pm 49.89$ | $2.4 \pm 0.09 \times 10^{-4}$ , $23.95 \pm 0.90$ |
| $n_\alpha/n_p$                   | 0.04                                            | $0.04 \pm 0.01$                                    | 0.04                                             |
| $v_\alpha$ (km s <sup>-1</sup> ) | $11.48 \pm 6.1$                                 | $396.32 \pm 49.83$                                 | –                                                |
| $T_\alpha$ (MK)                  | $1.23 \pm 0.04$                                 | $6.65 \pm 1.22$                                    | –                                                |
| $T_e$ (MK)                       | $1.23 \pm 0.04$                                 | $0.668 \pm 0.032$                                  | –                                                |
| $dB$ (km s <sup>-1</sup> )       | $22.4 \pm 1.6$                                  | $255.15 \pm 175.90$                                | $17.76 \pm 10.96$                                |
| $dV$ (km s <sup>-1</sup> )       | $22.4 \pm 1.6$                                  | $92.08 \pm 58.78$                                  | $38.40 \pm 33.94$                                |

**Supplementary Table 3:** List of all the energy flux budget terms at the Sun, Parker, and Solar Orbiter. Each term at the Sun and Solar Orbiter has been scaled to Parker Solar Probe by  $f_{Sun} = 0.27$  and  $f_{solo} = 0.95$ , respectively, to account for non-spherical expansion.

| Energy Flux (W m <sup>-2</sup> ) | Sun (1.05 R <sub>☉</sub> ) $\times f_{Sun}$ | Parker Solar Probe (11.75 R <sub>☉</sub> ) | Solar Orbiter (70 R <sub>☉</sub> ) $\times f_{solo}$ |
|----------------------------------|---------------------------------------------|--------------------------------------------|------------------------------------------------------|
| Kinetic Flux                     | $0.067 \pm 0.033$                           | $10.96 \pm 3.98$                           | $24.76 \pm 6.56$                                     |
| Enthalpy Flux                    | $44.86 \pm 17.27$                           | $3.62 \pm 0.66$                            | $1.35 \pm 0.55$                                      |

|                           |                   |                  |                   |
|---------------------------|-------------------|------------------|-------------------|
| Alfvén Wave Flux          | $18.3 \pm 2.17$   | $1.75 \pm 1.32$  | $0.44 \pm 0.53$   |
| Gravitational Energy Flux | $5.67 \pm 2.83$   | $47.82 \pm 7.19$ | $39.05 \pm 4.50$  |
| Total Energy Flux         | $68.91 \pm 18.18$ | $64.15 \pm 6.32$ | $65.60 \pm 12.14$ |
